# Supplementary material for: Examining the Factor Structure of the Pittsburgh Sleep Quality Index in a Multi-Ethnic Working Population in Singapore
Source: PubMed Central journal article supplement (PMC6926964; doi:10.3390/ijerph16234590), 2019-11-20
Supplement: ijerph-16-04590-s001.pdf [file ijerph-16-04590-s001.pdf]

**Table S1.** Correlations between PSQI components and overall scale

|                           | Correlation of item<br>with overall scale | Cronbach's $\alpha$ if the<br>item is eliminated |
|---------------------------|-------------------------------------------|--------------------------------------------------|
| <i>Timepoint 1</i>        |                                           |                                                  |
| Subjective sleep quality  | 0.640                                     | 0.555                                            |
| Sleep latency             | 0.638                                     | 0.555                                            |
| Sleep duration            | 0.575                                     | 0.582                                            |
| Habitual sleep efficiency | 0.463                                     | 0.626                                            |
| Sleep disturbances        | 0.560                                     | 0.576                                            |
| Sleep medication use      | 0.404                                     | 0.645                                            |
| Daytime dysfunction       | 0.581                                     | 0.580                                            |
| Cronbach's $\alpha$       | 0.627                                     |                                                  |
| <i>Timepoint 2</i>        |                                           |                                                  |
| Subjective sleep quality  | 0.634                                     | 0.546                                            |
| Sleep latency             | 0.658                                     | 0.535                                            |
| Sleep duration            | 0.515                                     | 0.596                                            |
| Habitual sleep efficiency | 0.469                                     | 0.614                                            |
| Sleep disturbances        | 0.596                                     | 0.563                                            |
| Sleep medication use      | 0.410                                     | 0.635                                            |
| Daytime dysfunction       | 0.578                                     | 0.571                                            |
| Cronbach's $\alpha$       | 0.619                                     |                                                  |
| <i>Timepoint 3</i>        |                                           |                                                  |
| Subjective sleep quality  | 0.682                                     | 0.530                                            |
| Sleep latency             | 0.669                                     | 0.537                                            |
| Sleep duration            | 0.575                                     | 0.578                                            |
| Habitual sleep efficiency | 0.459                                     | 0.623                                            |
| Sleep disturbances        | 0.569                                     | 0.581                                            |
| Sleep medication use      | 0.344                                     | 0.662                                            |
| Daytime dysfunction       | 0.580                                     | 0.576                                            |
| Cronbach's $\alpha$       | 0.624                                     |                                                  |

**Table S2.** Sensitivity analysis: Factor Matrix for the two-factor solutions at each timepoint for female participants only.

|                                 | <b>Perceived sleep quality</b> | <b>Sleep efficiency</b> |
|---------------------------------|--------------------------------|-------------------------|
| <i>Timepoint 1</i>              |                                |                         |
| Subjective sleep quality        | .75 <sup>a</sup>               | .31 <sup>f</sup>        |
| Sleep latency                   | .79 <sup>a</sup>               | -.05 <sup>f</sup>       |
| Sleep duration                  | .18 <sup>f</sup>               | .82 <sup>a</sup>        |
| Habitual sleep efficiency       | -.06 <sup>f</sup>              | .80 <sup>a</sup>        |
| Sleep disturbances              | .64 <sup>b</sup>               | -.13 <sup>f</sup>       |
| Sleep medication use            | .40 <sup>e</sup>               | .12 <sup>f</sup>        |
| Daytime dysfunction             | .69 <sup>b</sup>               | .18 <sup>f</sup>        |
| Percentage of total variance, % | 34.7                           | 18.9                    |
| <i>Timepoint 2</i>              |                                |                         |
| Subjective sleep quality        | .74 <sup>a</sup>               | -.05 <sup>f</sup>       |
| Sleep latency                   | .69 <sup>b</sup>               | .17 <sup>f</sup>        |
| Sleep duration                  | -.08 <sup>f</sup>              | .85 <sup>a</sup>        |
| Habitual sleep efficiency       | .22 <sup>f</sup>               | .77 <sup>a</sup>        |
| Sleep disturbances              | .57 <sup>c</sup>               | .10 <sup>f</sup>        |
| Sleep medication use            | .45 <sup>e</sup>               | -.06 <sup>f</sup>       |
| Daytime dysfunction             | .64 <sup>b</sup>               | -.11 <sup>f</sup>       |
| Percentage of total variance, % | 30.2                           | 18.1                    |
| <i>Timepoint 3</i>              |                                |                         |
| Subjective sleep quality        | .78 <sup>a</sup>               | .24 <sup>f</sup>        |
| Sleep latency                   | .76 <sup>a</sup>               | .14 <sup>f</sup>        |
| Sleep duration                  | .18 <sup>f</sup>               | .79 <sup>a</sup>        |
| Habitual sleep efficiency       | .10 <sup>f</sup>               | .85 <sup>a</sup>        |
| Sleep disturbances              | .55 <sup>c</sup>               | .03 <sup>f</sup>        |
| Sleep medication use            | .40 <sup>e</sup>               | -.41 <sup>e</sup>       |
| Daytime dysfunction             | .72 <sup>a</sup>               | .06 <sup>f</sup>        |
| Percentage of total variance, % | 34.5                           | 20.0                    |

Factor analysis conducted with maximum likelihood estimation extraction and direct oblimin rotation. a = excellent loadings, b = very good, c = good loading, d = fair loading, e = poor loading, f = loading too low to interpret.
